# Supplementary material
Source: PubMed Central journal article supplement (PMC6372332)
Supplement: NIHMS1009561-supplement-SI.pdf [file NIHMS1009561-supplement-SI.pdf]

# Supporting Information

## Fast Solver for Large Scale Multistate Bennett Acceptance Ratio Equations

Xinqiang Ding,<sup>†</sup> Jonah Z. Vilseck,<sup>‡</sup> and Charles L. Brooks III<sup>\*,†,‡,¶</sup>

<sup>†</sup>*Department of Computational Medicine & Bioinformatics, University of Michigan*

<sup>‡</sup>*Department of Chemistry, University of Michigan*

<sup>¶</sup>*Biophysics Program, University of Michigan, Ann Arbor, Michigan 48109, United States*

E-mail: brookscl@umich.edu

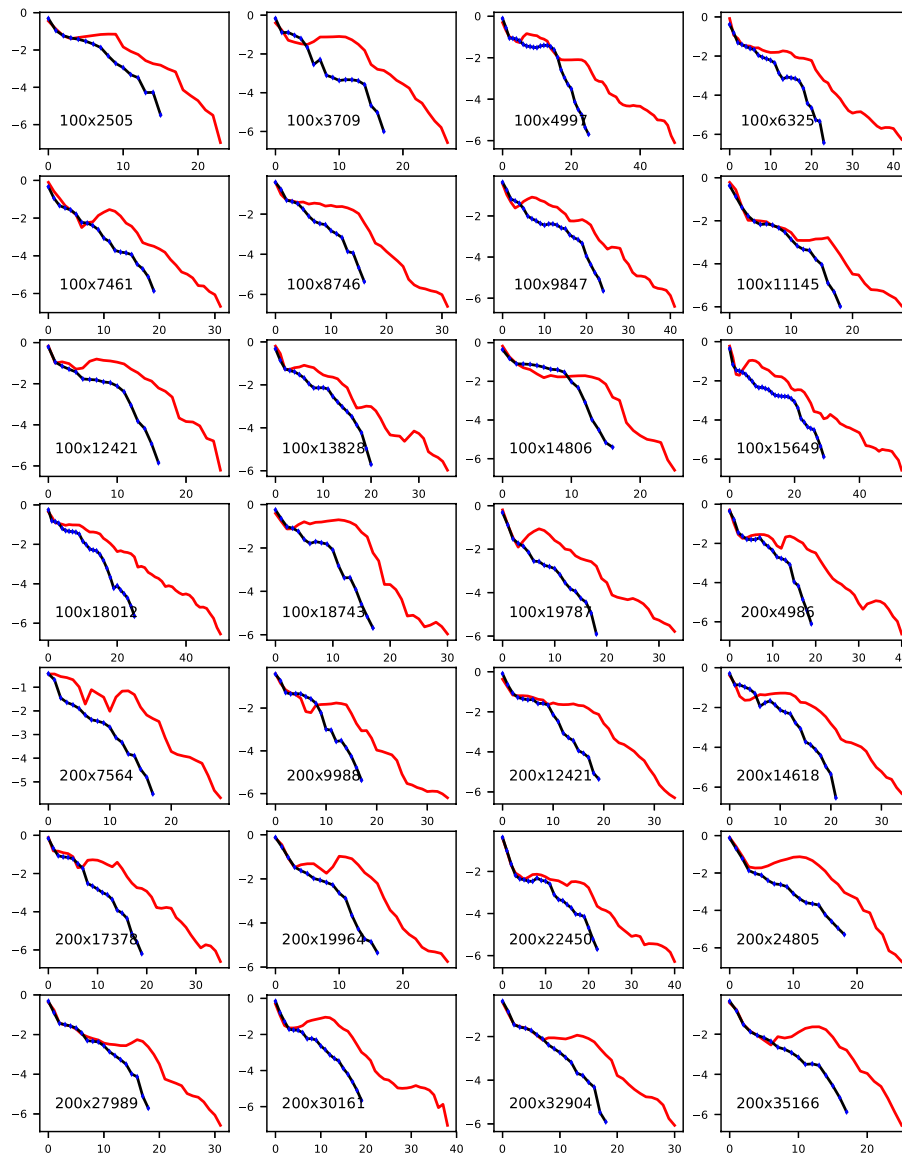

Figure S1: Estimator precision changes with the number of iterations for pymbar (red line), FastMBAR-CPU (black line), and FastMBAR-GPU (blue diamond) to solve MBAR/UWHAM equations of different sizes. All graphs use a log-10 scale for the Y axis. The numbers inside each subplot represent the size of the energy matrix.

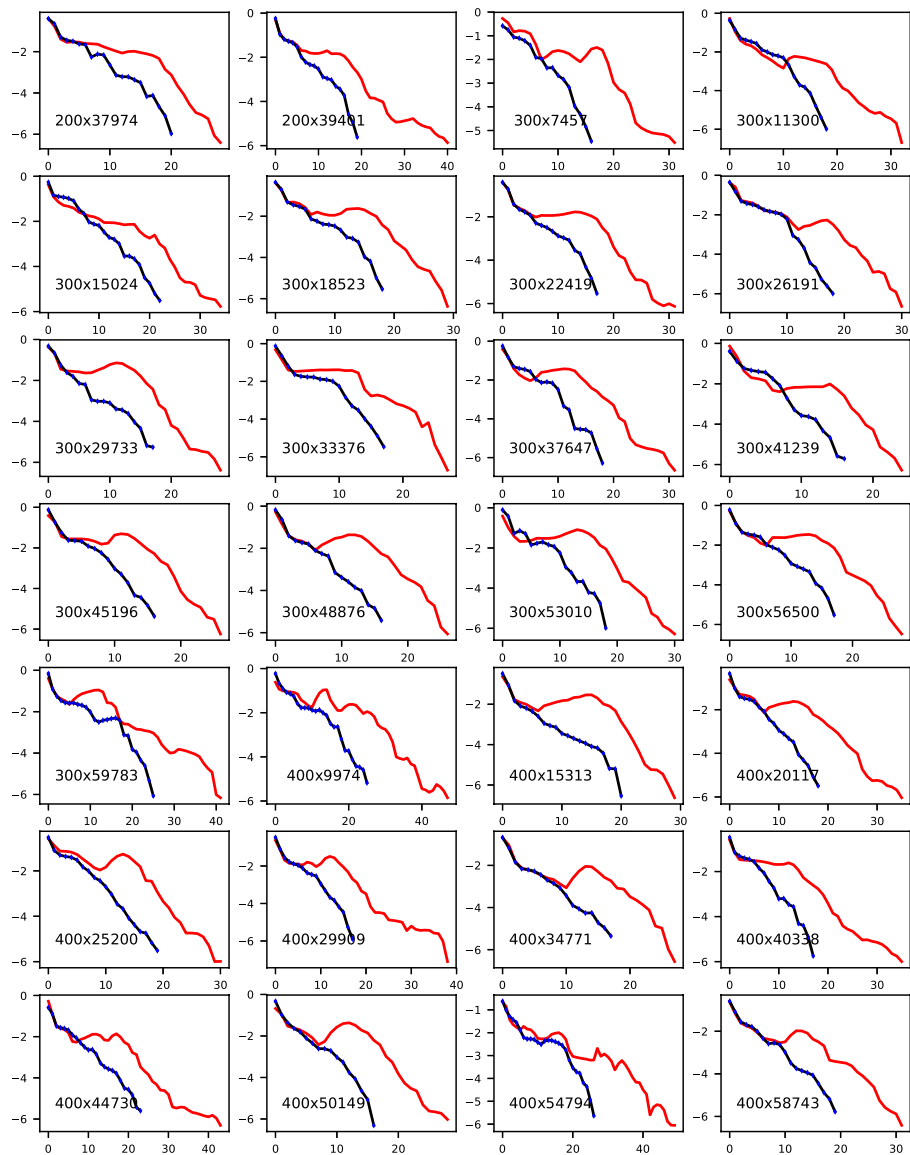

Figure S2: Estimator precision changes with the number of iterations for pymbar (red line), FastMBAR-CPU (black line), and FastMBAR-GPU (blue diamond) to solve MBAR/UWHAM equations of different sizes. All graphs use a log-10 scale for the Y axis. The numbers inside each subplot represent the size of the energy matrix.

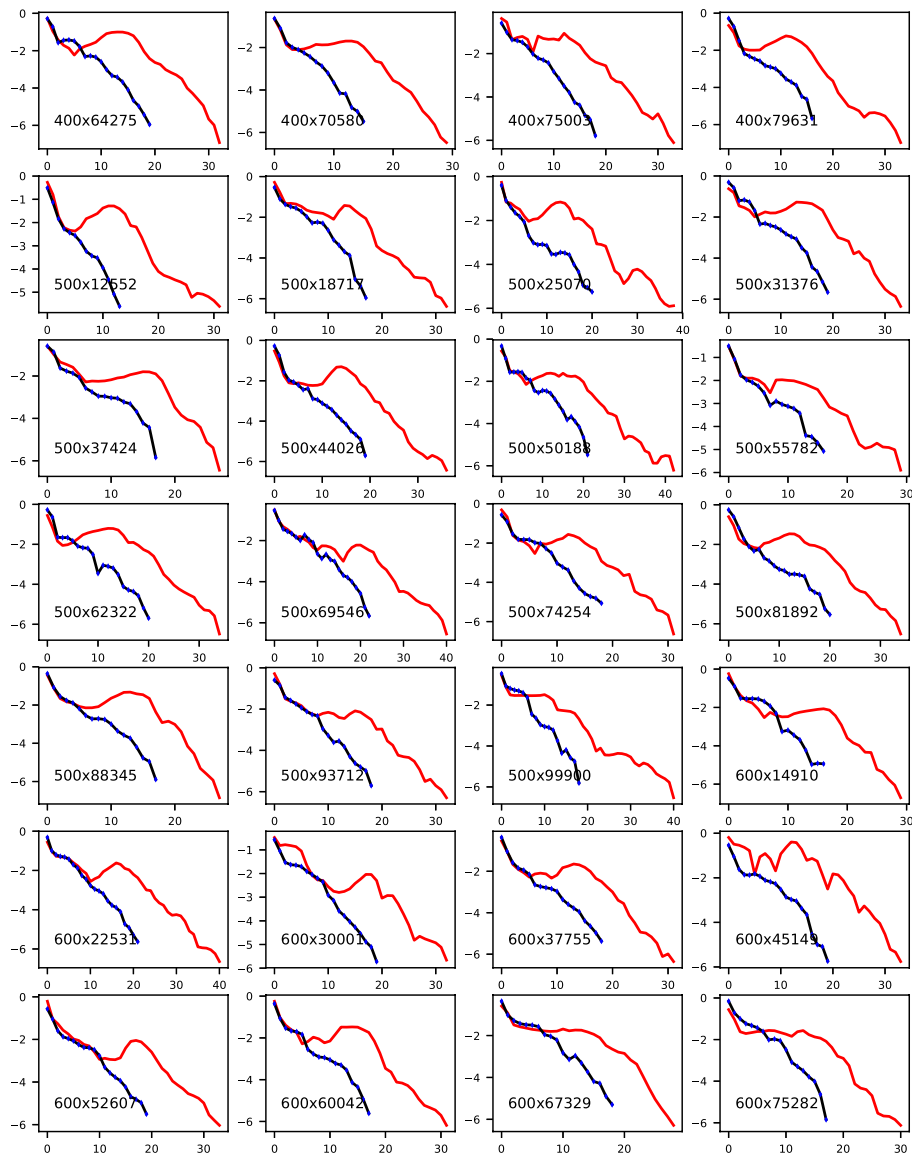

Figure S3: Estimator precision changes with the number of iterations for pymbar (red line), FastMBAR-CPU (black line), and FastMBAR-GPU (blue diamond) to solve MBAR/UWHAM equations of different sizes. All graphs use a log-10 scale for the Y axis. The numbers inside each subplot represent the size of the energy matrix.

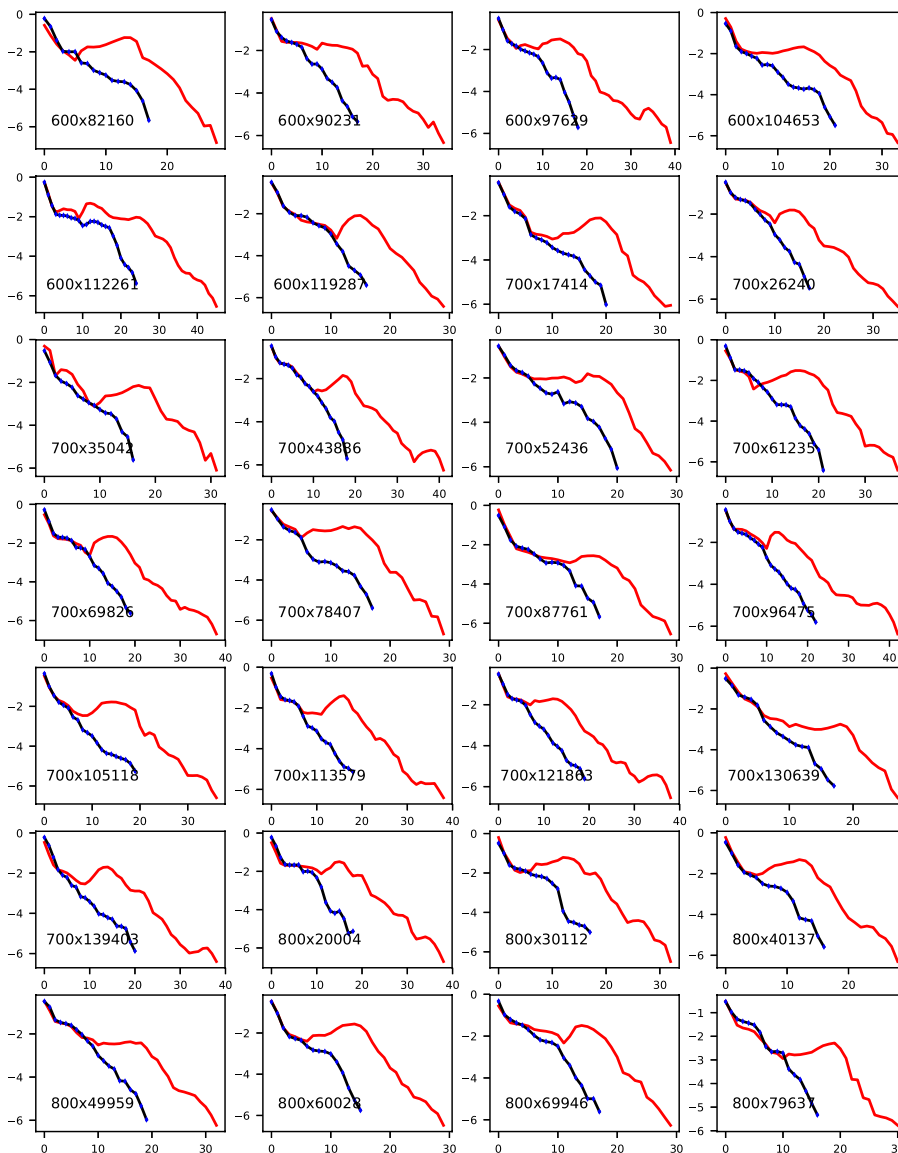

Figure S4: Estimator precision changes with the number of iterations for pymbar (red line), FastMBAR-CPU (black line), and FastMBAR-GPU (blue diamond) to solve MBAR/UWHAM equations of different sizes. All graphs use a log-10 scale for the Y axis. The numbers inside each subplot represent the size of the energy matrix.

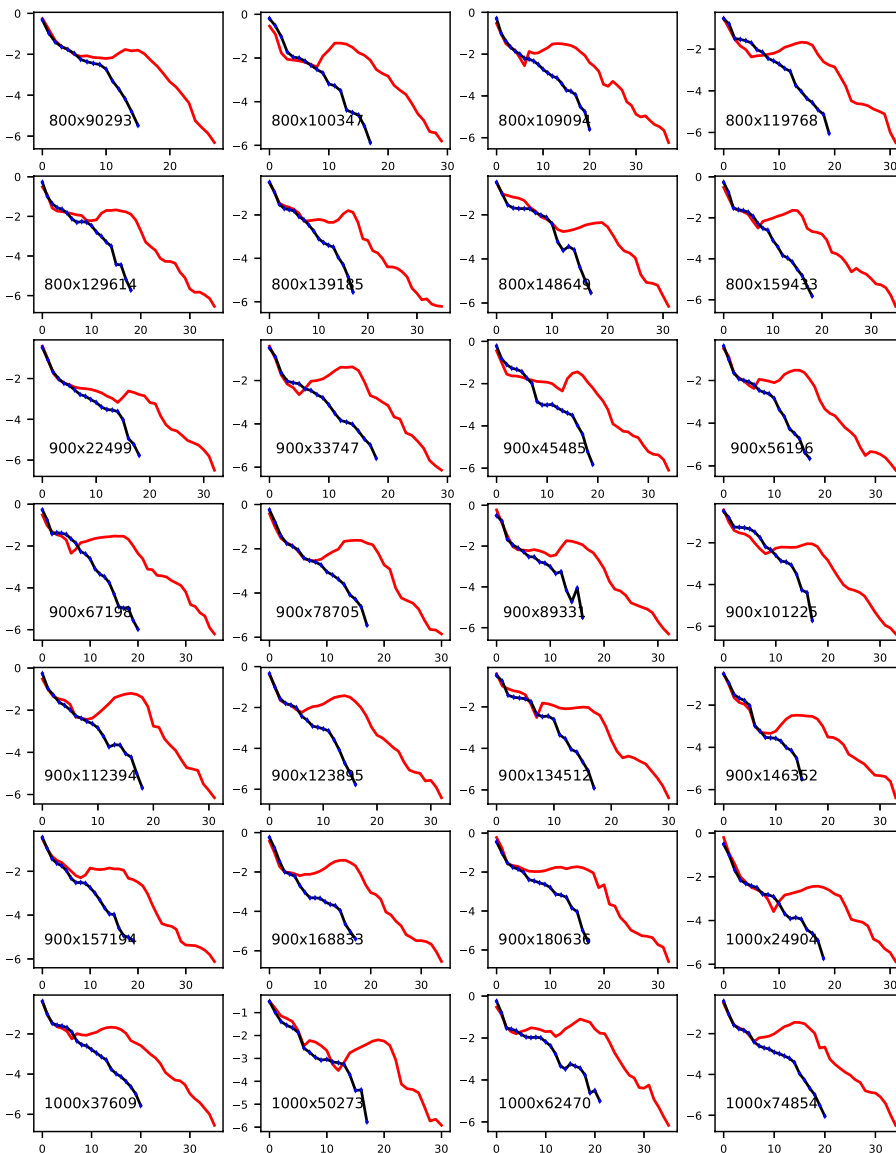

Figure S5: Estimator precision changes with the number of iterations for pymbar (red line), FastMBAR-CPU (black line), and FastMBAR-GPU (blue diamond) to solve MBAR/UWHAM equations of different sizes. All graphs use a log-10 scale for the Y axis. The numbers inside each subplot represent the size of the energy matrix.

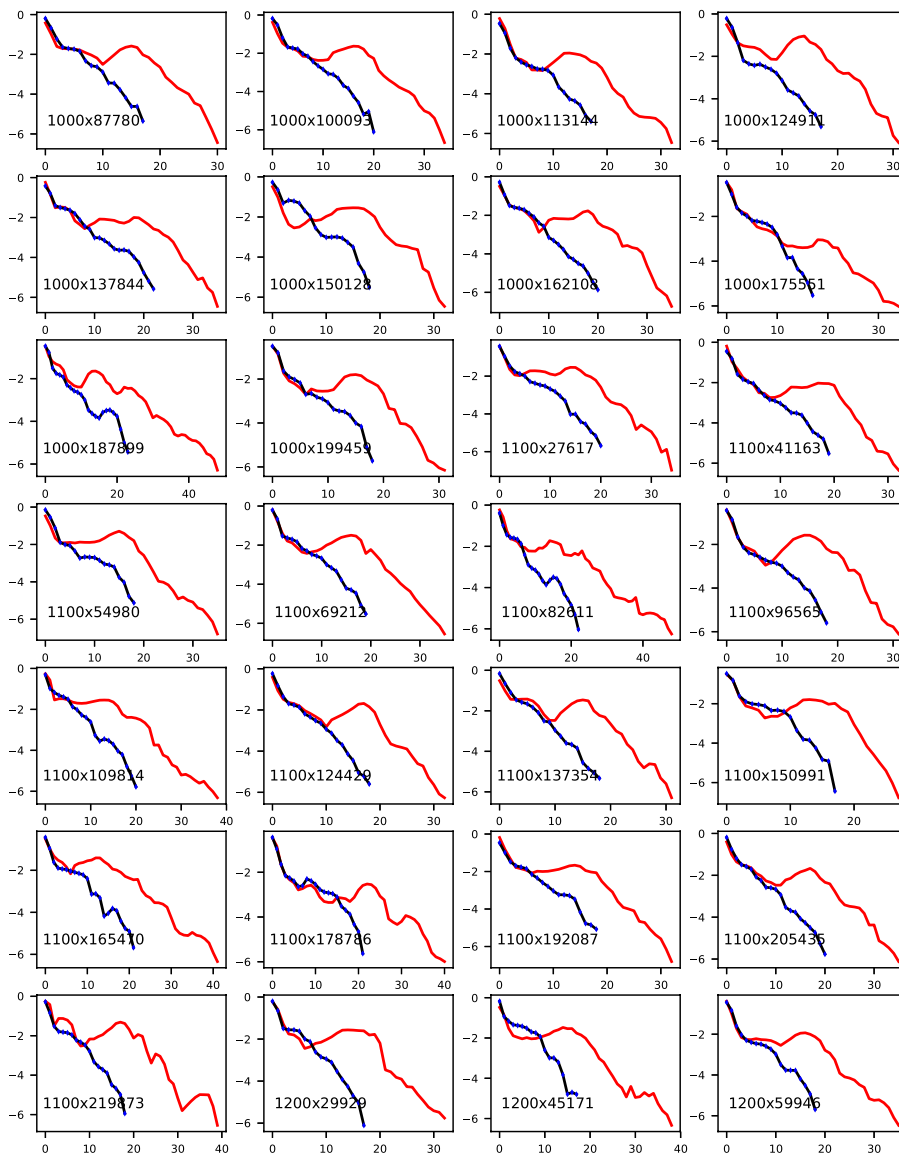

Figure S6: Estimator precision changes with the number of iterations for pymbar (red line), FastMBAR-CPU (black line), and FastMBAR-GPU (blue diamond) to solve MBAR/UWHAM equations of different sizes. All graphs use a log-10 scale for the Y axis. The numbers inside each subplot represent the size of the energy matrix.

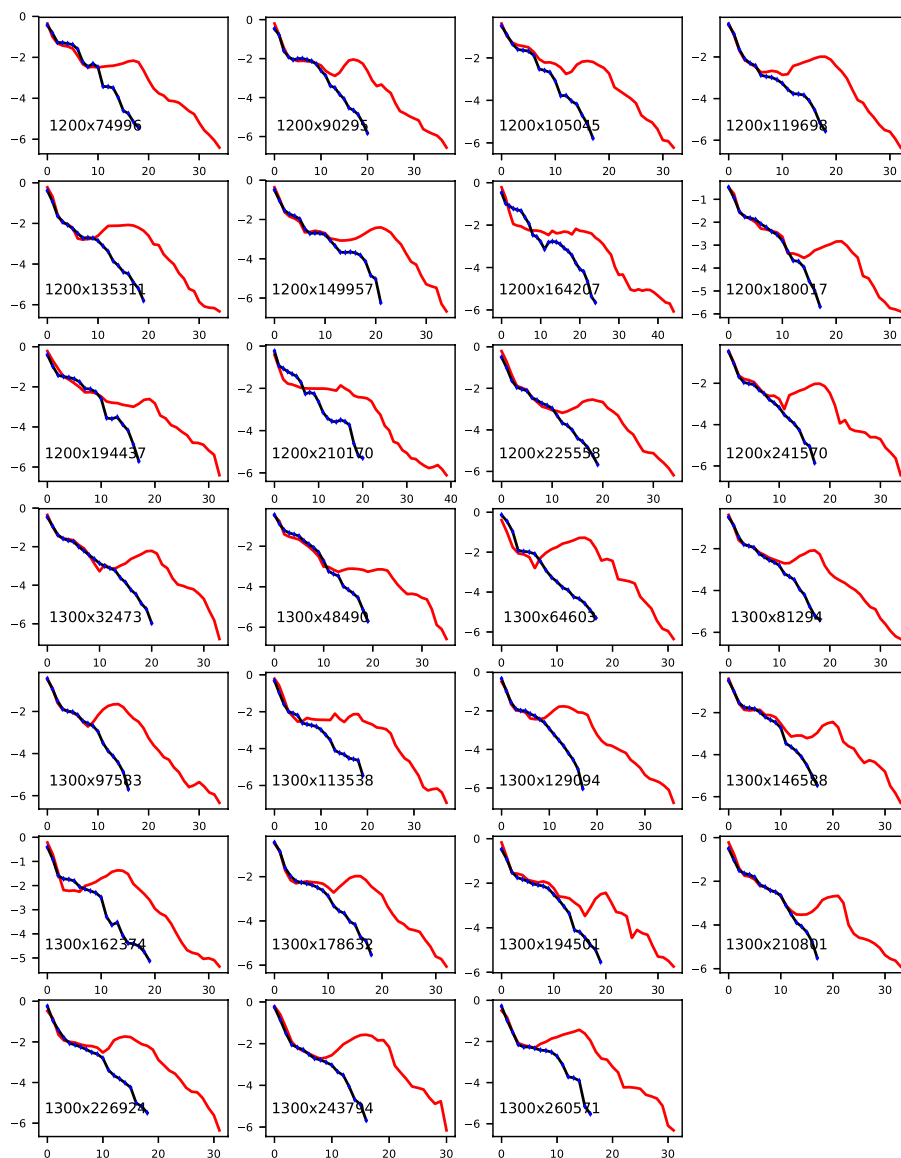

Figure S7: Estimator precision changes with the number of iterations for pymbar (red line), FastMBAR-CPU (black line), and FastMBAR-GPU (blue diamond) to solve MBAR/UWHAM equations of different sizes. All graphs use a log-10 scale for the Y axis. The numbers inside each subplot represent the size of the energy matrix.
